# Supplementary material for: New metallic ice phase under high pressure
Source: Royal Society of Chemistry journal article supplement (doi:10.1039/d4cp02543a), 2024-01-01
Supplement: d4cp02543a1.pdf [file d4cp02543a1.pdf]

## SUPPORTING INFORMATION

### New metallic ice phase under high pressure

Yingying Huang<sup>1,\*</sup>, Liuyuan Zhu<sup>1</sup>, Hanlin Li<sup>1</sup>, Haiping Fang<sup>1,2</sup>, Ruoyang Chen<sup>1,\*</sup>, Shiqi Sheng<sup>1,\*</sup>

<sup>1</sup>*School of Physics, East China University of Science and Technology, Shanghai, 200237, China.*

<sup>2</sup>*School of Physics, Zhejiang University, Hangzhou, 310027, China.*

\*Corresponding author. E-mail: huangyingying@ecust.edu.cn (Yingying Huang);  
ruoyang.chen@ecust.edu.cn (Ruoyang Chen); shengshiqi@ecust.edu.cn (Shiqi Sheng)

**Table S1.** Fractional coordinates of the TiO<sub>2</sub>\_brookite-*Pbca* structure with orthorhombic lattice (space group: *Pbca*; lattice constants:  $a = 5.436 \text{ \AA}$ ,  $b = 2.669 \text{ \AA}$ ,  $c = 2.669 \text{ \AA}$ ) at  $P = 1000 \text{ GPa}$ .

| Atom | <i>X</i> | <i>Y</i> | <i>Z</i> | Occupancy |
|------|----------|----------|----------|-----------|
| O    | 0.37463  | 0.50095  | 0.74083  | 1.0       |
| H    | 0.02268  | 0.29685  | 0.69590  | 1.0       |
| H    | 0.27737  | 0.44203  | 0.43927  | 1.0       |

**Table S2.** Fractional coordinates of the NaO<sub>2</sub>-*Pa3* structure with cubic lattice (space group: *Pa3*; lattice constants:  $a = b = c = 2.451 \text{ \AA}$ ) at pressure of 2000 GPa.

| Atom | <i>X</i> | <i>Y</i> | <i>Z</i> | Occupancy |
|------|----------|----------|----------|-----------|
| O    | 0.0      | 0.0      | 0.0      | 1.0       |
| H    | 0.36404  | 0.36404  | 0.36404  | 1.0       |

**Table S3.** Band gap (in eV) based on PBE functionals for Ag<sub>2</sub>O-*Pn3m*, TiO<sub>2</sub>\_brookite-*Pbca* and NaO<sub>2</sub>-*Pa3* phases. For the NaO<sub>2</sub>-*Pa3* structure, the band gap calculated using HSE06 hybrid functional is also provided in parentheses.

| Pressure<br>(GPa) | Band gap (eV) |
|-------------------|---------------|
|-------------------|---------------|

|      | $\text{Ag}_2\text{O}-Pn\bar{3}m$ | $\text{TiO}_2\text{-brookite-}Pbca$ | $\text{NaO}_2\text{-}Pa\bar{3}$ |
|------|----------------------------------|-------------------------------------|---------------------------------|
| 500  | 9.4122                           |                                     |                                 |
| 1000 | 8.1659                           | 4.9993                              | 1.2502 (2.6275)                 |
| 1500 | 7.1088                           | 2.8780                              | 0.7760 (2.0816)                 |
| 2000 | 6.1535                           | 1.5859                              | 0.3901 (1.6153)                 |
| 2500 | 5.2825                           | 0.8891                              | 0.0919 (1.2844)                 |
| 3000 |                                  |                                     | 0 (1.0285)                      |
| 4000 |                                  |                                     | 0 (0.6883)                      |
| 5000 |                                  |                                     | 0 (0.4991)                      |
| 6000 |                                  |                                     | 0 (0.2895)                      |
| 7000 |                                  |                                     | 0 (0.2337)                      |

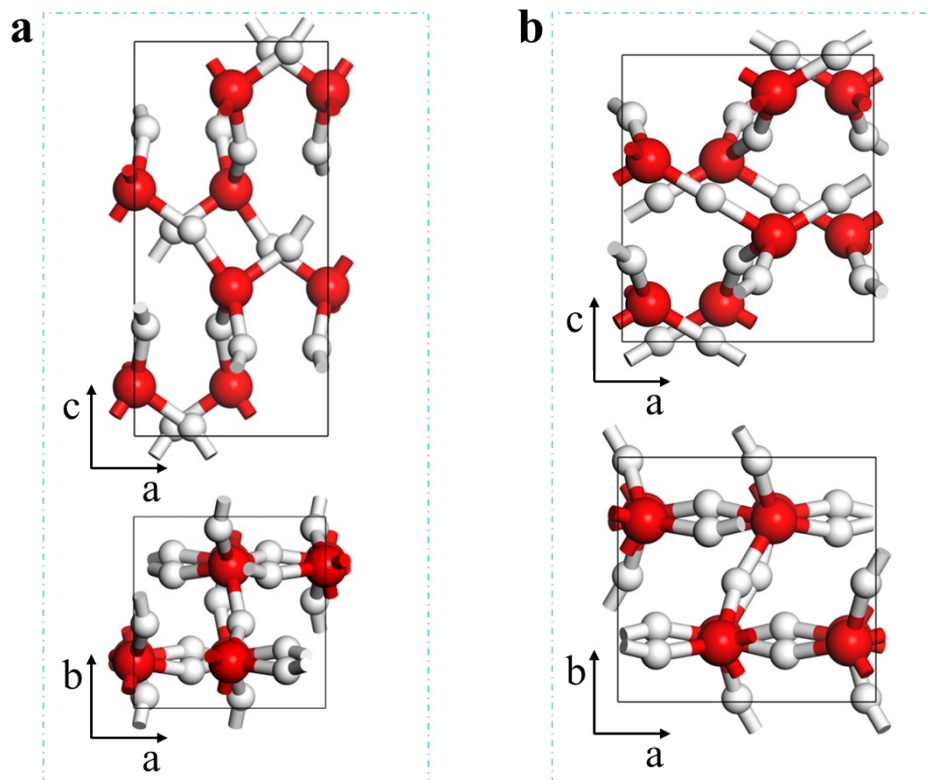

**Figure S1.** Crystal structures. (a)  $\text{TiO}_2$ \_brookite- $Pbca$  structure at pressure of 1000 GPa in this work. (b)  $Pbca$  phase at pressure of 1000 GPa from Ref. [1]. The large red spheres and small white spheres denote the O and H atoms, respectively.

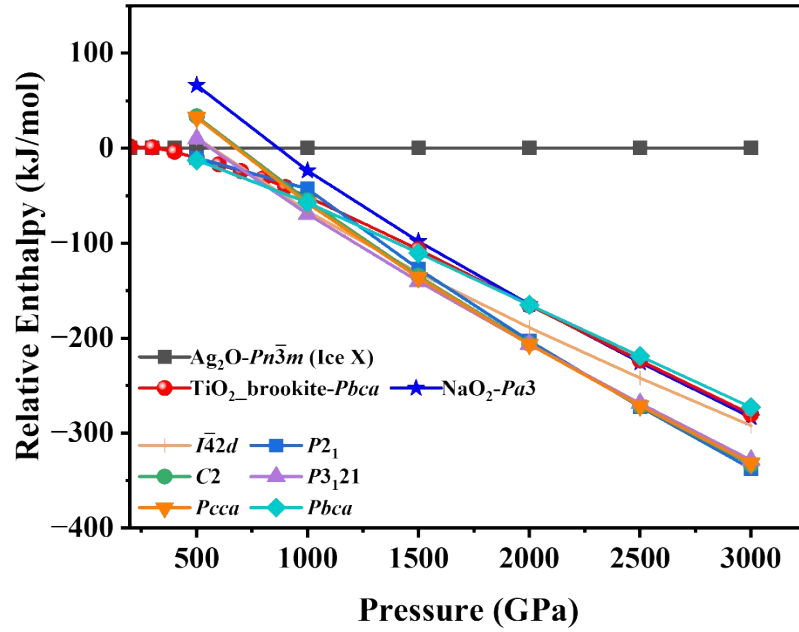

**Figure S2.** Relative enthalpy per water molecule versus pressure for ice phases, with  $\text{Ag}_2\text{O}-Pn\bar{3}m$  (ice X) as a reference. The high-pressure phases of  $I\bar{4}2d$ ,  $P2_1$ ,  $C2$ ,  $P3_121$ ,  $Pcca$  and  $Pbca$  are from Ref. [1] and Ref. [2].

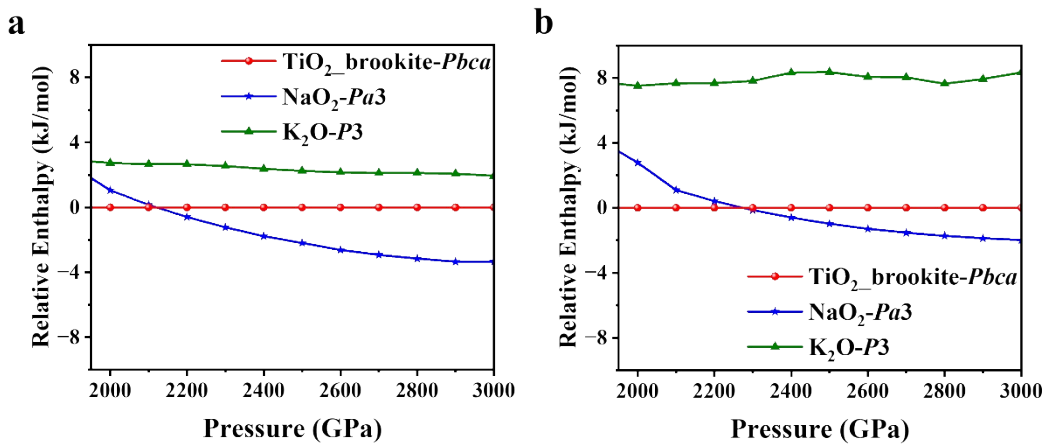

**Figure S3.** Relative enthalpy of ice phase at the pressure around 2000 to 3000 GPa, with  $\text{TiO}_2$ \_brookite- $Pbca$  as a reference. (a) Old relative enthalpy per water molecule versus pressure for ice phases based on soft PAW pseudopotentials. (b) New relative enthalpy per water molecule versus pressure for ice phases with hard PAW pseudopotentials and zero-point energy.

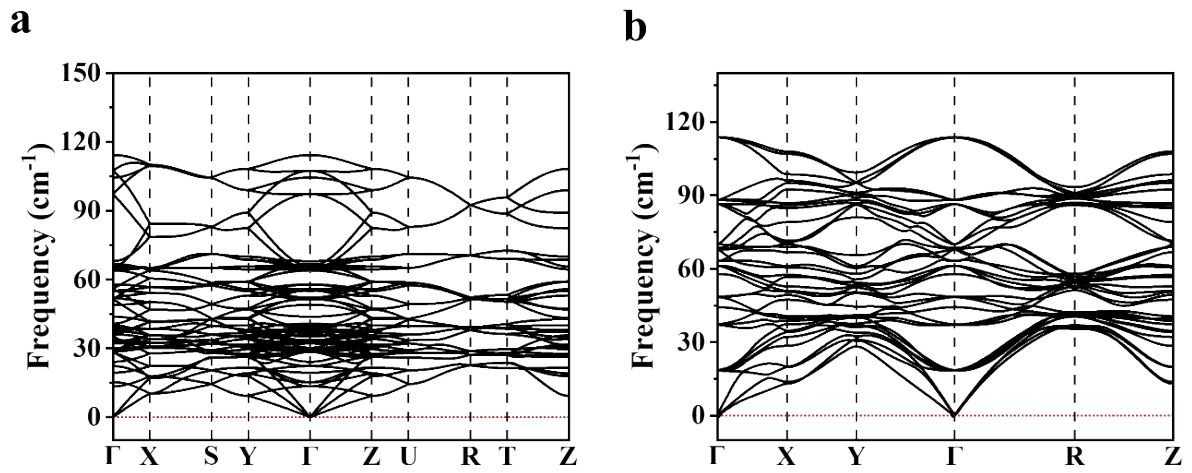

**Figure S4.** Phonon spectrum for (a)  $\text{TiO}_2$ \_brookite- $Pbca$  at  $P = 300$  GPa and (b)  $\text{NaO}_2$ - $Pa3$  at  $P = 2200$  GPa.

### References

1. Y. Wang, H. Liu, J. Lv, L. Zhu, H. Wang and Y. Ma, *Nat. Commun.* 2011, **2**, 563.
2. C. J. Pickard, M. Martinez-Canales and R. J. Needs, *Phys. Rev. Lett.* 2013, **110**, 245701.
3. B. Militzer and H. F. Wilson, *Phys. Rev. Lett.* 2010, **105**, 195701.
